# Supplementary material
Source: HighWire-hosted journal article supplement (https://jnm.snmjournals.org/highwire/filestream/95296/field_highwire_adjunct_files/0/209841_Supplemental_Data.pdf)
Supplement: 209841_Supplemental_Data.pdf [file 209841_Supplemental_Data.pdf]

| Patient NO. | Age (yr) | Sex | BW (Kg) | Primary Tumor      | Metastases               | Grading (Ki-67 index) | Prior treatment                                                                                                                |
|-------------|----------|-----|---------|--------------------|--------------------------|-----------------------|--------------------------------------------------------------------------------------------------------------------------------|
| 1           | 45       | M   | 86      | Pancreas           | liver                    | G2 (10%)              | Distal pancreatectomy, hepatic radiofrequency ablation, Sutent, Endostar+Dacarbazine+Fluorouracil chemotherapy, Octreotide LAR |
| 2           | 44       | M   | 50      | Pancreas           | liver                    | G2 (8%)               | Sulfatinib, Everolimus, Octreotide LAR                                                                                         |
| 3           | 51       | M   | 86      | Lung               | lymph nodes, liver       | G1 (1%)               | Octreotide LAR, Bevacizumab+EP chemotherapy, interventional therapy, Sulfatinib, Sutent, Dacarbazine+Fluorouracil, Everolimus  |
| 4           | 42       | F   | 55      | Mediastinum, MEN-1 | lymph nodes              | G2/G3 (10%-40%)       | Resection of mediastinal neoplasm, Dacarbazine, Xeloda, Octreotide LAR, Sutent                                                 |
| 5           | 61       | M   | 71      | Pancreas           | liver                    | G2 (+3%)              | I-125 seeds implantation in the pancreas, Octreotide LAR, Sutent                                                               |
| 6           | 27       | F   | 61      | Pancreas           | Liver, lymph nodes       | G2 (9%)               | Sulfatinib, Everolimus, Etoposide, Capecitabine+Temozolomide chemotherapy, Anti-PD-1 immunotherapy                             |
| 7           | 49       | M   | 69      | Lung               | Lymph nodes, liver, bone | G2 (7%)               | Cisplatin+Etoposide chemotherapy, Cisplatin+vinorelbine chemotherapy, Octreotide LAR                                           |
| 8           | 33       | M   | 72      | Pancreas           | Liver, lymph nodes       | G1 (+2%)              | Octreotide LAR                                                                                                                 |

**Supplemental Table 1.** Patient demographics

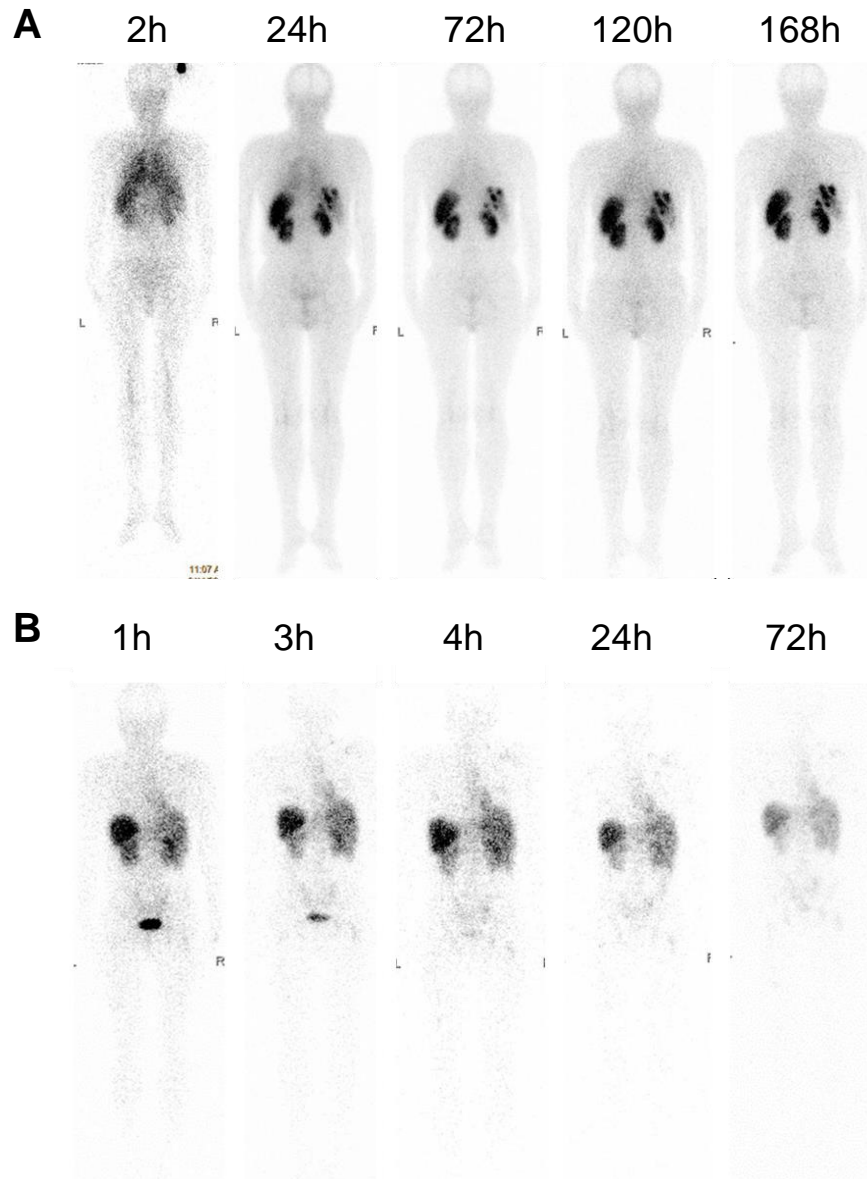

**SUPPLEMENTAL FIGURE 1.** (A) Representative whole-body posterior projection images of a 61-y-old male patient with neuroendocrine tumor liver metastases at 2, 24, 72, 120 and 168 h after intravenous administration of  $^{177}\text{Lu}$ -DOTA-EB-TATE.  $^{177}\text{Lu}$ -DOTA-EB-TATE cleared from the blood pool over time and persistently accumulated in the tumors. Other main organs with  $^{177}\text{Lu}$ -DOTA-EB-TATE uptake were liver, spleen, kidneys and bladder. (B) Representative whole-body posterior projection images of a 49-y-old male patient with neuroendocrine tumor liver metastases

at 1, 3, 4, 24 and 72 h after intravenous administration of  $^{177}\text{Lu}$ -DOTA-TATE.  $^{177}\text{Lu}$ -DOTA-TATE showed rapid renal clearance. Tumor uptake also gradually decreased along with time.

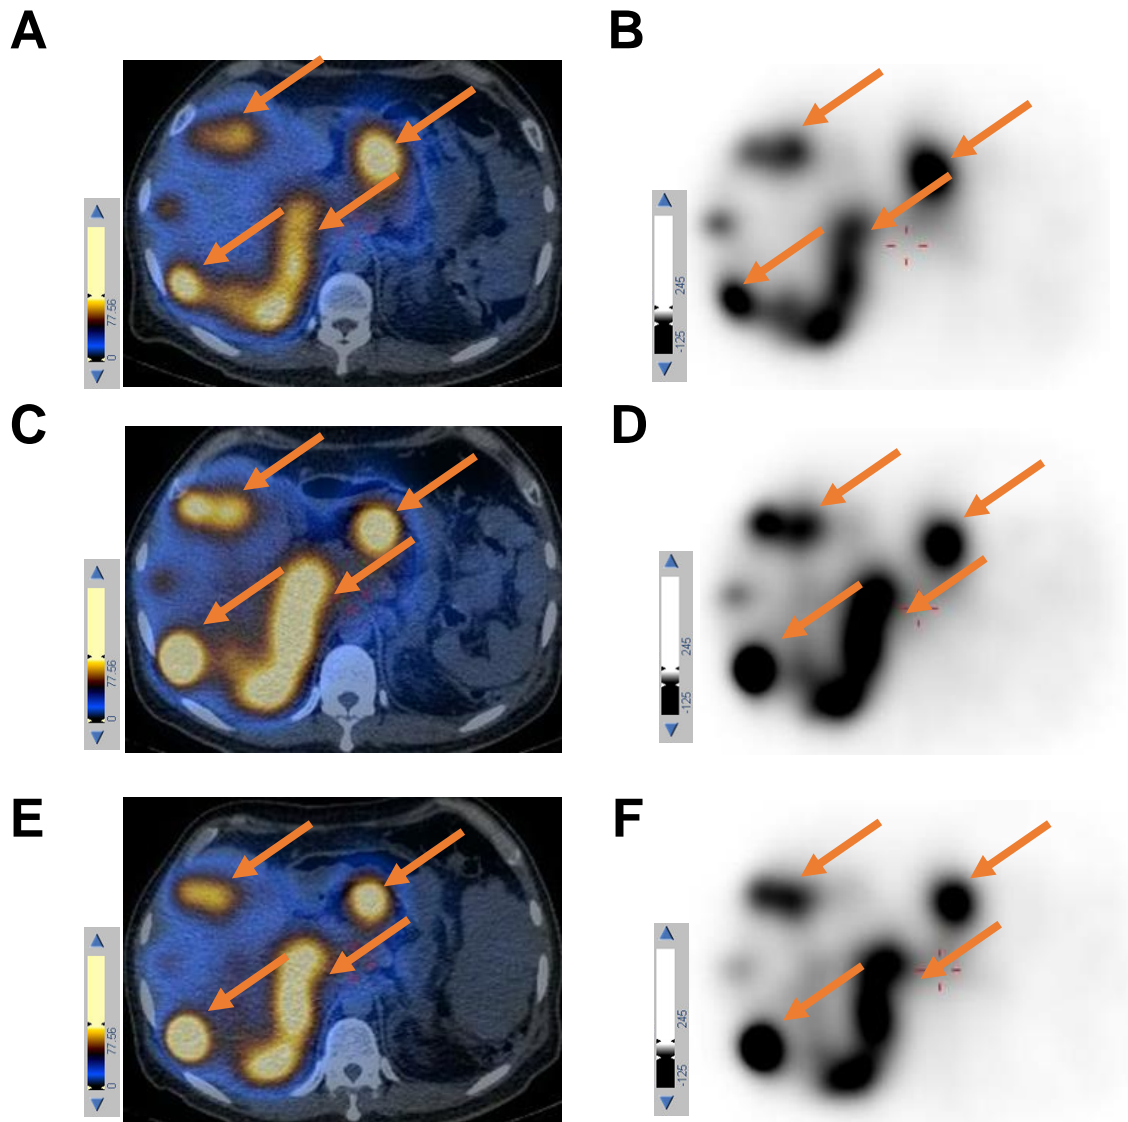

**SUPPLEMENTAL FIGURE 2.**  $^{177}\text{Lu}$ -DOTA-EB-TATE SPECT/CT of a 45-y-old male NET patient with multiple liver metastases. Multiple liver metastases were shown on axial SPECT/CT and SPECT images at 1 d (A&B), 3 d (C&D), and 7 d (F&F) after administration of  $^{177}\text{Lu}$ -DOTA-EB-TATE.

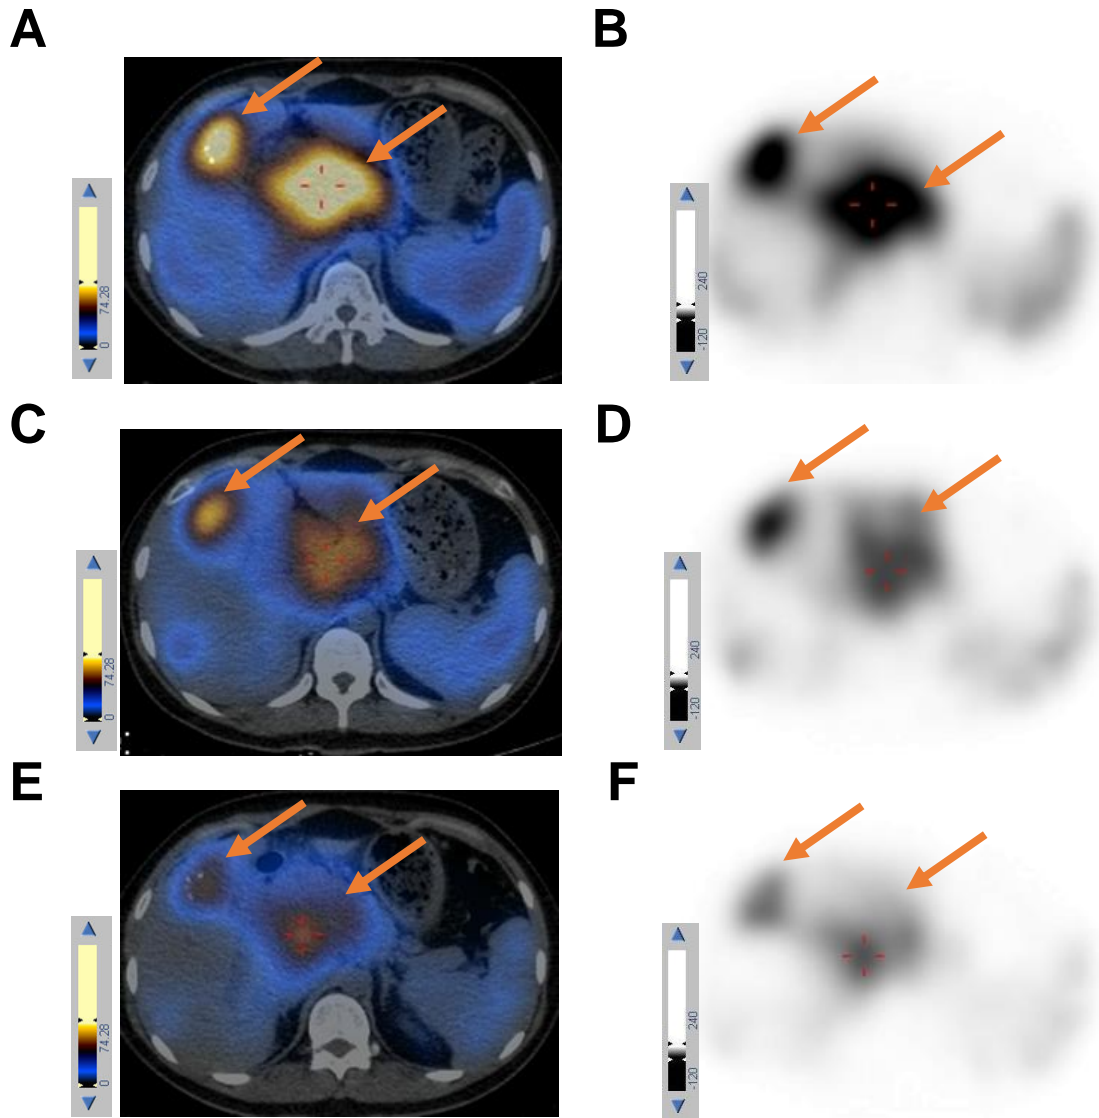

**SUPPLEMENTAL FIGURE 3.**  $^{177}\text{Lu}$ -DOTA-TATE SPECT/CT in a 27-year-old woman with advanced NET (G2). Multiple liver metastases were shown axial SPECT/CT and SPECT images at 3 h (A&B), 24 h (C&D) and 3 d (E&F) after administration of  $^{177}\text{Lu}$ -DOTA-TATE.

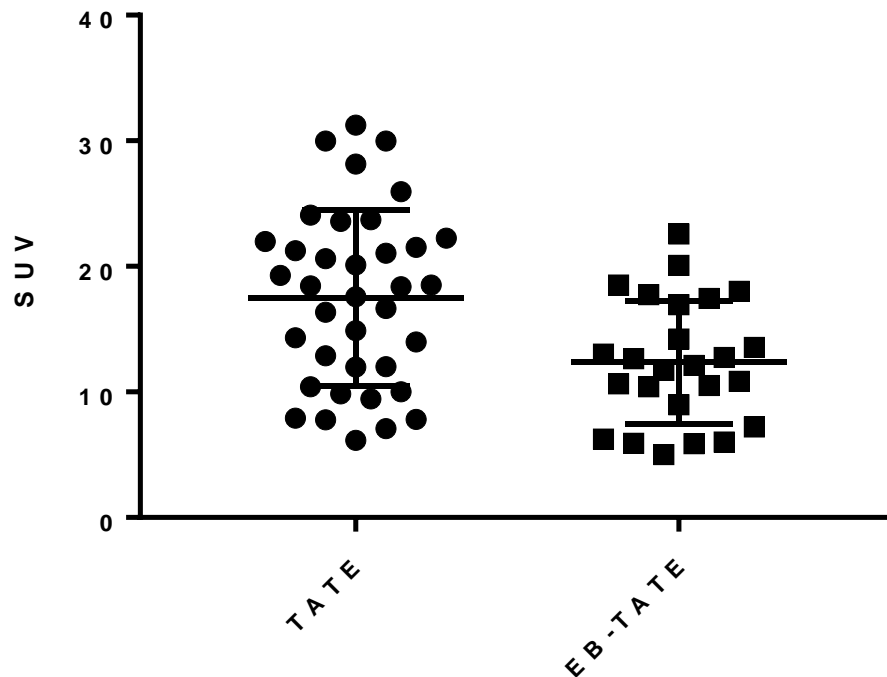

**SUPPLEMENTAL FIGURE 4.** SUVs of NET lesions quantified by  $^{68}\text{Ga}$ -DOTATATE PET in 3 patients from  $^{177}\text{Lu}$ -DOTA-TATE group and 5 patients from  $^{177}\text{Lu}$ -DOTA-TATE group. Multiple lesions were identified in each patient. In patients receiving  $^{177}\text{Lu}$ -DOTA-EB-TATE, the average tumor SUV of  $^{68}\text{Ga}$ -DOTA-TATE PET was  $12.37 \pm 4.92$ , which was significantly lower than that in patients receiving  $^{177}\text{Lu}$ -DOTA-TATE ( $17.49 \pm 7.02$ ,  $P < 0.05$ ).
